# Supplementary material for: Source apportionment of atmospheric ammonia before, during, and after the2014 APEC summit in Beijing using stable nitrogen isotope signatures
Source: Copernicus journal article supplement (doi:10.5194/acp-16-11635-2016), 2016-09-20
Supplement: Supplementary file 1 [file acp-16-11635-2016-supplement.pdf]

Supplement of Atmos. Chem. Phys., 16, 11635–11647, 2016  
<http://www.atmos-chem-phys.net/16/11635/2016/>  
doi:10.5194/acp-16-11635-2016-supplement  
© Author(s) 2016. CC Attribution 3.0 License.

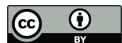

Atmospheric  
Chemistry  
and Physics  
Open Access  
EGU

*Supplement of*

## **Source apportionment of atmospheric ammonia before, during, and after the 2014 APEC summit in Beijing using stable nitrogen isotope signatures**

**Yunhua Chang et al.**

*Correspondence to:* Congrui Deng (congruideng@fudan.edu.cn) and Xuejun Liu (liu310@cau.edu.cn)

The copyright of individual parts of the supplement might differ from the CC-BY 3.0 licence.

**This file includes:**

**Table**

Table S1. Source information, sampling time (from June 2014 to January 2015), mass concentration ( $\mu\text{g m}^{-3}$ ) and  $\delta^{15}\text{N}$  value (‰) of the 44  $\text{NH}_3$  samples used in this study.

**Figures**

Figure S1. A schematic of the sampling in the exhaust of ceiling duct.

Figure S2. Time-series evolutions of hourly meteorological parameters and air pollutants and before, during, and after the 2014 APEC summit in Beijing.

Figure S3. Time-series evolutions of mass concentrations of  $\text{SO}_2$ ,  $\text{NO}_x$ ,  $\text{CO}$ ,  $\text{NH}_3$ , and isotopic composition of  $\text{NH}_3$  ( $\delta^{15}\text{N-NH}_3$ ) for each  $\text{NH}_3$  sampling event in Beijing before, during, and after the 2014 APEC summit.

**Table**

**Table S1.** Source information, sampling time (from June 2014 to January 2015), mass concentration ( $\mu\text{g m}^{-3}$ ) and  $\delta^{15}\text{N}$  value (‰) of the 44  $\text{NH}_3$  samples used in this study.

| Category                | Sub-category             | Sampling Site             | Time on                   | Time off                   | Season | $\text{NH}_3$ conc. | $\delta^{15}\text{N-NH}_3$ | Method  | Comments |
|-------------------------|--------------------------|---------------------------|---------------------------|----------------------------|--------|---------------------|----------------------------|---------|----------|
| Livestock               | pig                      | piglet sty-SHPF           | 9 <sup>th</sup> 12, 7:15  | 9 <sup>th</sup> 12, 19:15  | winter | 520.3               | -27.2                      | PT-IRMS | a        |
|                         |                          | piglet sty-SHPF           | 10 <sup>th</sup> 12, 7:10 | 10 <sup>th</sup> 12, 19:10 | winter | 667.5               | -28.2                      | PT-IRMS | a        |
|                         |                          | piglet sty-SHPF           | 3 <sup>rd</sup> 6, 7:10   | 3 <sup>rd</sup> 6, 19:10   | summer | 1334.7              | -29.3                      | PT-IRMS | a        |
|                         |                          | piglet sty-SHPF           | 4 <sup>th</sup> 6, 7:00   | 4 <sup>th</sup> 6, 19:00   | summer | 1151.4              | -31.7                      | PT-IRMS | a        |
|                         |                          | adult pig sty-SHPF        | 9 <sup>th</sup> 12, 7:25  | 9 <sup>th</sup> 12, 19:25  | winter | 462.2               | -27.1                      | PT-IRMS | a        |
|                         |                          | adult pig sty-SHPF        | 10 <sup>th</sup> 12, 7:20 | 9 <sup>th</sup> 12, 19:20  | winter | 696.2               | -30.3                      | PT-IRMS | a        |
|                         |                          | adult pig sty-SHPF        | 4 <sup>th</sup> 6, 7:10   | 4 <sup>th</sup> 6, 19:10   | summer | 1502.8              | -29.8                      | PT-IRMS | a        |
| On-road traffic         | vehicle                  | Handan Tunnel             | 1 <sup>st</sup> 7, 19:00  | 1 <sup>st</sup> 8, 7:40    | summer | 92.1                | -9.6                       | PT-IRMS | b        |
|                         |                          | Handan Tunnel             | 1 <sup>st</sup> 8, 7:40   | 1 <sup>st</sup> 9, 15:30   | summer | 87.4                | -12.2                      | PT-IRMS | b        |
|                         |                          | Handan Tunnel             | 3 <sup>rd</sup> 12, 11:18 | 9 <sup>th</sup> 1, 9:43    | winter | 56.5                | -16.7                      | PT-IRMS | b        |
|                         |                          | Handan Tunnel             | 9 <sup>th</sup> 1, 9:43   | 5 <sup>th</sup> 2, 10:15   | winter | 61.2                | -17.8                      | PT-IRMS | b        |
|                         |                          | Handan Tunnel             | 1 <sup>st</sup> 7, 19:05  | 1 <sup>st</sup> 8, 7:45    | summer | 83.7                | -11.9                      | PT-IRMS | b        |
|                         |                          | Handan Tunnel             | 1 <sup>st</sup> 8, 7:45   | 1 <sup>st</sup> 9, 15:35   | summer | 77.5                | -14.1                      | PT-IRMS | b        |
|                         |                          | Handan Tunnel             | 3 <sup>rd</sup> 12, 11:22 | 9 <sup>th</sup> 1, 9:47    | winter | 35.7                | -16.4                      | PT-IRMS | b        |
|                         |                          | Handan Tunnel             | 9 <sup>th</sup> 1, 9:47   | 5 <sup>th</sup> 2, 10:20   | winter | 33.2                | -15.1                      | PT-IRMS | b        |
| Waste                   | solid waste              | Liangcheng Estate WTS     | 27 <sup>th</sup> 5, 12:10 | 4 <sup>th</sup> 6, 10:17   | summer | 329.6               | -29.9                      | EA-IRMS | c        |
|                         |                          | Liangcheng Estate WTS     | 4 <sup>th</sup> 6, 10:20  | 11 <sup>th</sup> 6, 9:45   | summer | 412.8               | -31.4                      | EA-IRMS | f        |
|                         |                          | Liangcheng Estate WTS     | 5 <sup>th</sup> 1, 11:43  | 12 <sup>th</sup> 1, 9:40   | winter | 363.8               | -37.2                      | EA-IRMS | f        |
|                         |                          | Liangcheng Estate WTS     | 12 <sup>th</sup> 1, 9:40  | 12 <sup>th</sup> 1, 21:40  | winter | 271.2               | -36.0                      | PT-IRMS | f        |
|                         |                          | Fudan campus WTS          | 27 <sup>th</sup> 5, 10:53 | 4 <sup>th</sup> 6, 9:20    | summer | 488.6               | -32.2                      | EA-IRMS | f        |
|                         |                          | Fudan campus WTS          | 4 <sup>th</sup> 6, 9:30   | 11 <sup>th</sup> 6, 8:34   | summer | 542.4               | -30.7                      | EA-IRMS | f        |
|                         |                          | Fudan campus WTS          | 6 <sup>th</sup> 1, 8:50   | 6 <sup>th</sup> 1, 20:50   | winter | 275.5               | -35.7                      | PT-IRMS | f        |
|                         |                          | Fudan campus WTS          | 13 <sup>th</sup> 1, 7:30  | 13 <sup>th</sup> 1, 19:30  | winter | 349.4               | -37.6                      | PT-IRMS | f        |
|                         | wastewater               | Quyong WWTP               | 5 <sup>th</sup> 7, 14:20  | 6 <sup>th</sup> 7, 14:20   | summer | 258.5               | -40.7                      | PT-IRMS | d        |
|                         |                          | Quyong WWTP               | 5 <sup>th</sup> 7, 14:20  | 6 <sup>th</sup> 7, 14:20   | summer | 247.0               | -41.9                      | PT-IRMS | g        |
|                         |                          | Quyong WWTP               | 10 <sup>th</sup> 1, 10:55 | 11 <sup>th</sup> 1, 10:55  | winter | 127.2               | -40.6                      | PT-IRMS | g        |
|                         |                          | Quyong WWTP               | 10 <sup>th</sup> 1, 10:55 | 11 <sup>th</sup> 1, 10:55  | winter | 151.0               | -40.9                      | PT-IRMS | g        |
|                         |                          | Quyong WWTP               | 5 <sup>th</sup> 7, 14:23  | 6 <sup>th</sup> 7, 14:23   | summer | 236.2               | -40.7                      | PT-IRMS | g        |
|                         |                          | Quyong WWTP               | 5 <sup>th</sup> 7, 14:23  | 6 <sup>th</sup> 7, 14:23   | summer | 243.3               | -42.0                      | PT-IRMS | g        |
|                         |                          | Quyong WWTP               | 10 <sup>th</sup> 1, 10:58 | 11 <sup>th</sup> 1, 10:58  | winter | 154.8               | -39.2                      | PT-IRMS | g        |
| human excreta           | Quyong WWTP              | 10 <sup>th</sup> 1, 10:58 | 11 <sup>th</sup> 1, 10:58 | winter                     | 142.1  | -41.9               | PT-IRMS                    | g       |          |
|                         | Dongfang Estate          | 16 <sup>th</sup> 7, 14:25 | 16 <sup>th</sup> 7, 16:25 | summer                     | 3295.8 | -39.3               | PT-IRMS                    | e       |          |
|                         | Dongfang Estate          | 7 <sup>th</sup> 8, 14:40  | 7 <sup>th</sup> 8, 16:40  | summer                     | 3534.3 | -38.1               | PT-IRMS                    | h       |          |
|                         | Dongfang Estate          | 9 <sup>th</sup> 1, 9:10   | 9 <sup>th</sup> 1, 11:10  | winter                     | 3415.5 | -37.9               | PT-IRMS                    | h       |          |
|                         | Dongfang Estate          | 12 <sup>th</sup> 1, 9:35  | 12 <sup>th</sup> 1, 11:35 | winter                     | 3238.0 | -39.2               | PT-IRMS                    | h       |          |
|                         | Fudan teaching building  | 13 <sup>th</sup> 7, 9:15  | 13 <sup>th</sup> 7, 11:15 | summer                     | 5272.5 | -37.3               | PT-IRMS                    | h       |          |
|                         | Fudan teaching building  | 5 <sup>th</sup> 8, 13:50  | 5 <sup>th</sup> 8, 15:50  | summer                     | 6211.0 | -39.0               | PT-IRMS                    | h       |          |
|                         | Fudan teaching building  | 7 <sup>th</sup> 1, 8:40   | 7 <sup>th</sup> 1, 10:40  | winter                     | 5492.2 | -37.4               | PT-IRMS                    | h       |          |
| Fudan teaching building | 14 <sup>th</sup> 1, 8:30 | 14 <sup>th</sup> 1, 10:30 | winter                    | 5614.7                     | -39.6  | PT-IRMS             | h                          |         |          |

| Fertilizer | urea | Fudan laboratory | 10 <sup>th</sup> 5, 8:50 | 10 <sup>th</sup> 5, 14:50 | / | 165.6 | -52.0 | EA-IRMS | f |
|------------|------|------------------|--------------------------|---------------------------|---|-------|-------|---------|---|
|            |      | Fudan laboratory | 10 <sup>th</sup> 5, 8:50 | 10 <sup>th</sup> 5, 17:50 | / | 247.5 | -51.4 | EA-IRMS | i |
|            |      | Fudan laboratory | 10 <sup>th</sup> 5, 8:50 | 10 <sup>th</sup> 5, 20:50 | / | 369.1 | -50.2 | EA-IRMS | i |
|            |      | Fudan laboratory | 10 <sup>th</sup> 5, 8:50 | 10 <sup>th</sup> 5, 23:50 | / | 575.4 | -47.6 | EA-IRMS | i |
|            |      | Fudan laboratory | 10 <sup>th</sup> 5, 8:50 | 11 <sup>th</sup> 5, 1:00  | / | 623.7 | -48.7 | EA-IRMS |   |

- a. Pigs dominate the livestock breeding in Eastern China, so as to Shanghai and its surrounding regions where almost all livestock farms are pigs. Therefore, Ogawa PSDs were deployed in the Shanghai pig breeding farm (SHPF; 121.582°E, 30.856°N), a leading pig production unit in and around the region. Specifically, four Ogawa NH<sub>3</sub> PSDs were attached to the center pillars (~1.5 m above ground level) of two pigsties, a 66-head piglet sty and a 25-head adult pig sty. Both sites are in 38.5 m<sup>2</sup> without the operation of ventilation fan during our sampling period, which could significantly reduce the interference of open air.
- b. Tests were conducted in the Handan Road tunnel (121.509°E, 31.302°N; ~2 m above ground level), a city tunnel located in the front of the main gate of Fudan University. As a part of the Mid-ring Road in Shanghai and one of the busiest traffic sections, the average traffic density in the tunnel is around 150000 vehicles per day, most of which are personal and light-duty gasoline vehicles. The tunnel is 760 m long with two bores of four lanes in each direction, and each bore has a cross-sectional area of 66.4 m<sup>2</sup> (14.75 m × 4.5 m).
- c. The production of odors (including NH<sub>3</sub>) from municipal solid waste (MSW) is an inevitable consequence of urbanization, and this is particularly true in the waste transfer stations (WTS) where MSW is unloaded from garbage collection trucks and temporarily stored in a compacting container before being reloaded onto larger long-distance transport vehicles for shipment to landfills or other treatment facilities. Two WTSs in the metropolitan areas of Shanghai were selected, one is adjacent to a densely populated residential community called Zhongxing Liangcheng Estate (121.479°E, 31.305°N) and another is in the teaching zone of Fudan University (121.511°E, 31.306°N). At each site, two Ogawa NH<sub>3</sub> PSDs were intruded into the garbage compacting container for one week (EA-IRMS) or 12 hr (PT-IRMS).
- d. The storage and treatment of municipal wastewater and domestic sewage in wastewater treatment plants (WWTPs) appears to be a source NH<sub>3</sub> in urban areas. To collect wastewater-originated NH<sub>3</sub>, four Ogawa NH<sub>3</sub> PSDs were hanged on two ropes through a protective shield (designed mainly to avoid the escape of toxic H<sub>2</sub>S) over the influent sewer of Quyang WWTP (121.492°E, 31.285°N), in which a large amount of NH<sub>3</sub> can be produced through the anaerobic decomposition of urea and other organic N compounds in wastewater.
- e. In urban China, human excreta are typically stored in a three-grille septic tank under the building at first. After a series of anaerobic decomposition processes, a substantial amount of odors (including NH<sub>3</sub>) will be generated and emitted through a ceiling duct. The liquid supernatant will then flow away from the third grille to the municipal sewage system. Samples were collected from the ceiling ducts of two buildings (a residential building called Dongfang Estate with 21 residents and a five-floor teaching building in Fudan campus, respectively). To prevent potential perturbation of the outdoor environment, measurements were taken approximately 1.5 m from the exhaust end of the three ceiling ducts.
- f. China consumed 33.6 Mt or 33% of the world's N-fertilizer in 2009, 66.7% of them were urea, and the rest. The total amount of N-fertilizer application in Beijing is around 100 kt annually, in which urea accounts for nearly 70%. Extensive laboratory simulations and in situ micrometeorological measurements have confirmed that the NH<sub>3</sub> volatilization rates are of highly variable and controlled by various factors such as soil pH, moisture, and temperature. While quantification of the emission factor from urea-N application was beyond the scope of this study. To collect NH<sub>3</sub> solely from urea volatilization, a simplified laboratory volatilization experiment, similar to the one described by [Roelcke *et al.*, Laboratory measurements and simulations of ammonia volatilization from urea applied to calcareous Chinese loess soils, *Plant & Soil*, 1996, 181:123-129] was performed. Specifically, five volatilization apparatuses were running in parallel. 1 L soils collected directly from a vegetable field (top layer of 0-20 cm) were poured into a glass breaker (2 L) first, and then 100 g urea was spread evenly over the soil surface together with a fume cupboard for each measurement; a clean tray and two Ogawa NH<sub>3</sub> PSDs (consisting four filters) were then deposited into it in sequence. After that, the mouth of the breaker was sealed with plastic film for half hour, leaving a little opening to decrease the air pressure in it. Four

filters in two PSDs: a filter was used to determine  $\text{NH}_3$  concentration; the other three were weighed and enclosed in tin capsules to be analyzed by an elemental analyzer combustion coupled with IRMS.

## Figures

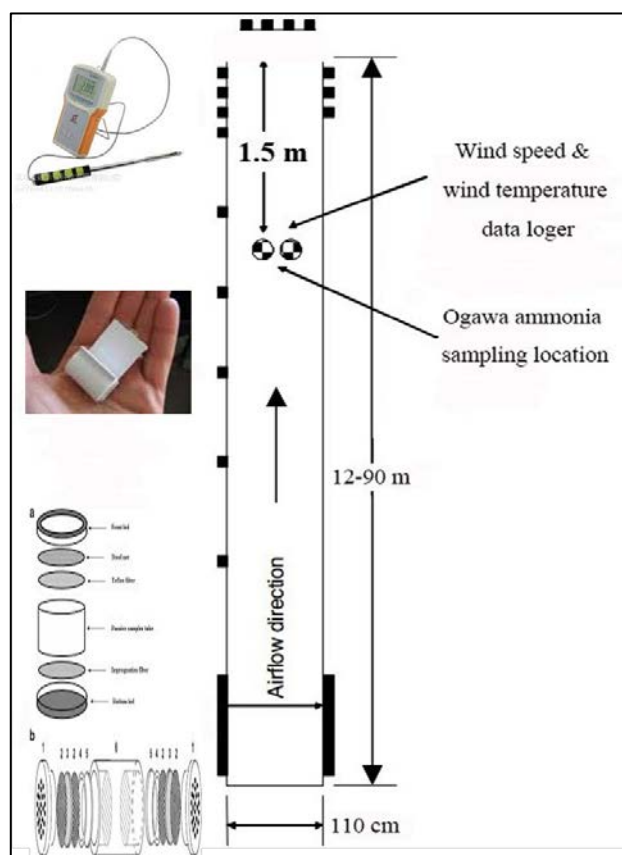

**Figure S1.** A schematic of the sampling in the exhaust of ceiling duct. According to China’s “Code for planning of urban environmental sanitation facilities” (GB 50337-2003), “fecal sewage front-end processing facility”, also known as septic tanks, are recommended in building construction for human excreta pre-treatment to avoid direct discharging of fecal sewage into the urban sewage pipe network. Although it is not mandatory to install septic tanks, to reduce the burden of wastewater treatment in sewage treatment plants, almost all cities in China have adopted the septic tank system (Cheng, H., H. Qiu, and M. Liu (2010), Review of setting septic tank in building outdoor drainage. *Fujian Architecture & Construction*, 129(150), 4-5. In Chinese with English abstract). In Shanghai, human excreta are also stored in a three-grille septic tank under the building at first. After a series of anaerobic decomposition processes, a substantial amount of odors (including  $\text{NH}_3$ ) will be generated and emitted through a ceiling duct (polyvinyl chloride pipe). In our study, to avoid the inference of ambient air, samplings were taken approximately 1.5 m from the exhaust end of the ceiling duct. Moreover, although the mouth of the ceiling duct was open, the ceiling duct can be viewed as a one-way outflow channel of  $\text{NH}_3$  emissions (from septic tank to open atmosphere).

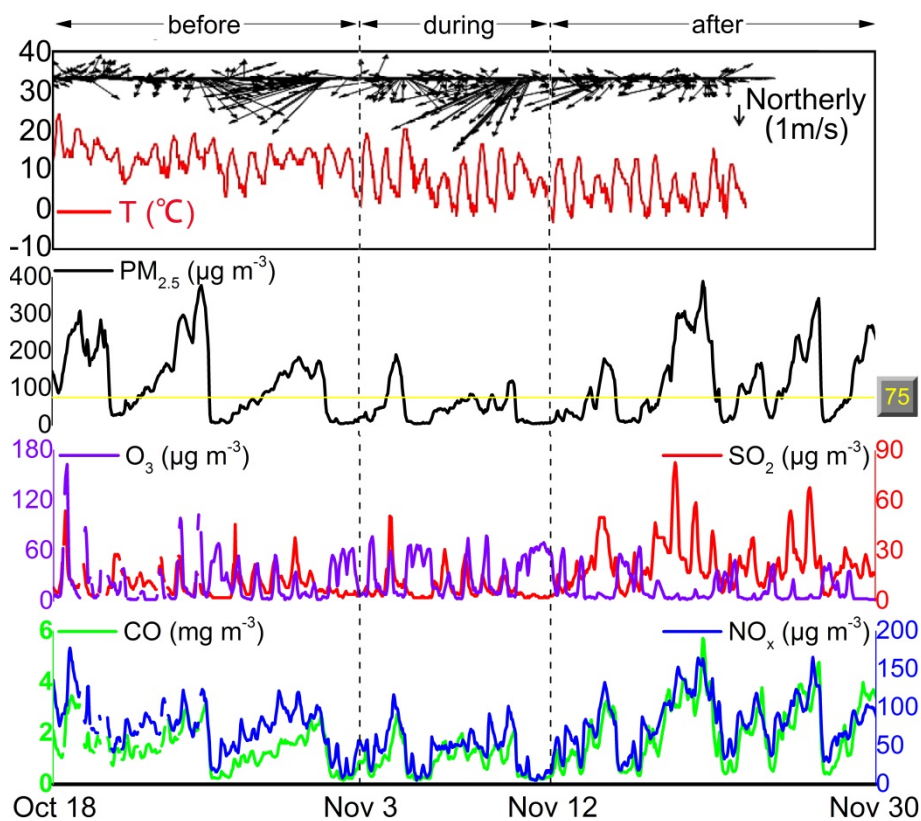

**Figure S2.** Time-series evolutions of hourly meteorological parameters (temperature, wind speed & direction; modified from *Li, et al. ACP, 2015, 15(14): 7945-7959. Doi: 10.5194/acp-15-7945-2015*) and air pollutants and before, during, and after the 2014 APEC summit in Beijing.

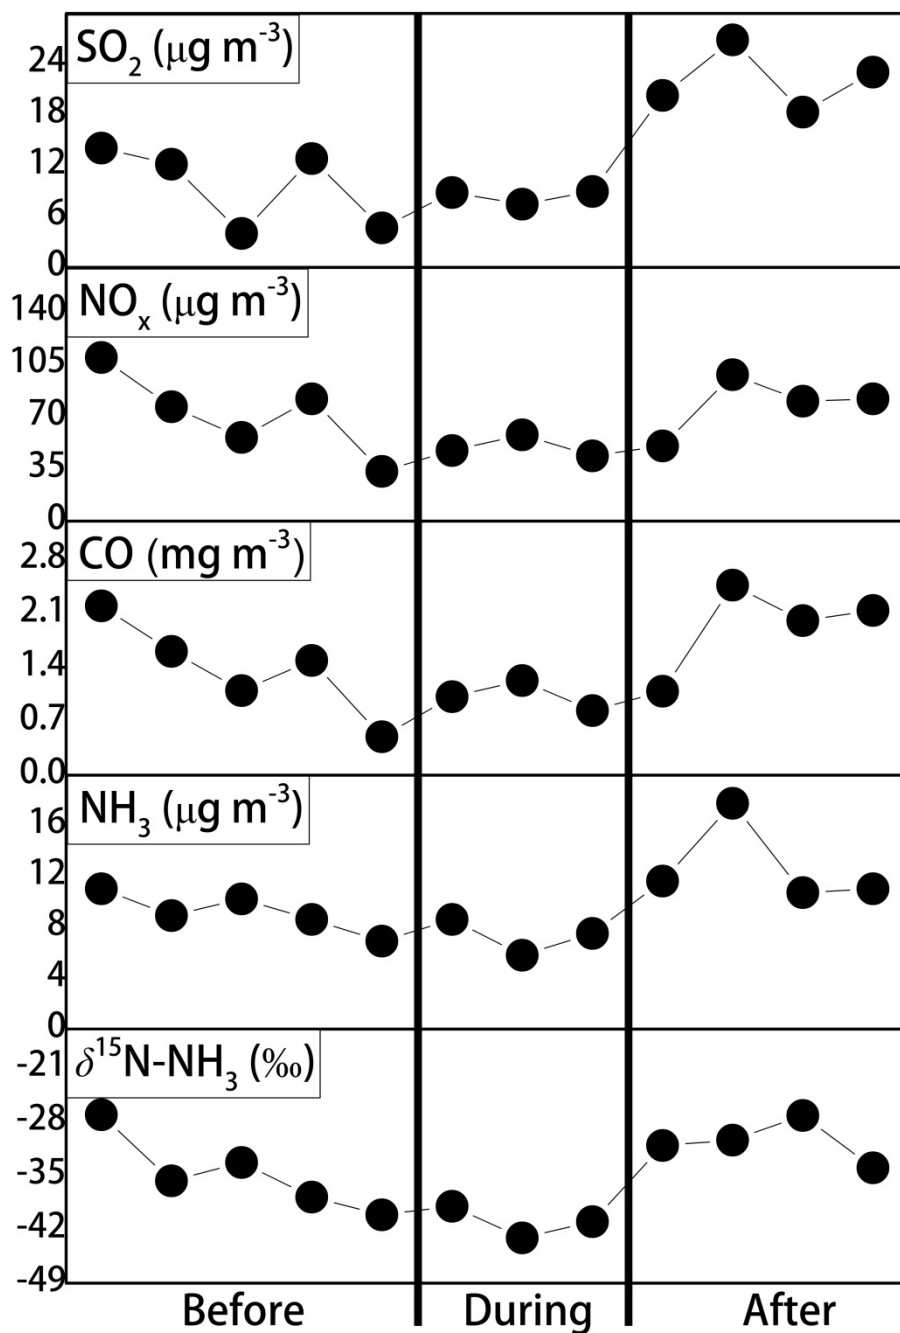

**Figure S3.** Time-series evolutions of mass concentrations of SO<sub>2</sub>, NO<sub>x</sub>, CO, NH<sub>3</sub>, and isotopic composition of NH<sub>3</sub> (δ<sup>15</sup>N-NH<sub>3</sub>) for each NH<sub>3</sub> sampling event in Beijing before, during, and after the 2014 APEC summit.
